# Supplementary material for: Biophysical Properties of Foamed and Solid Polymers Used in Orthotics and Prosthetics
Source: MDPI journal article supplement (doi:10.3390/ma14226877), 2021-11-15
Supplement: s1 [file s1]

## Supplementary information

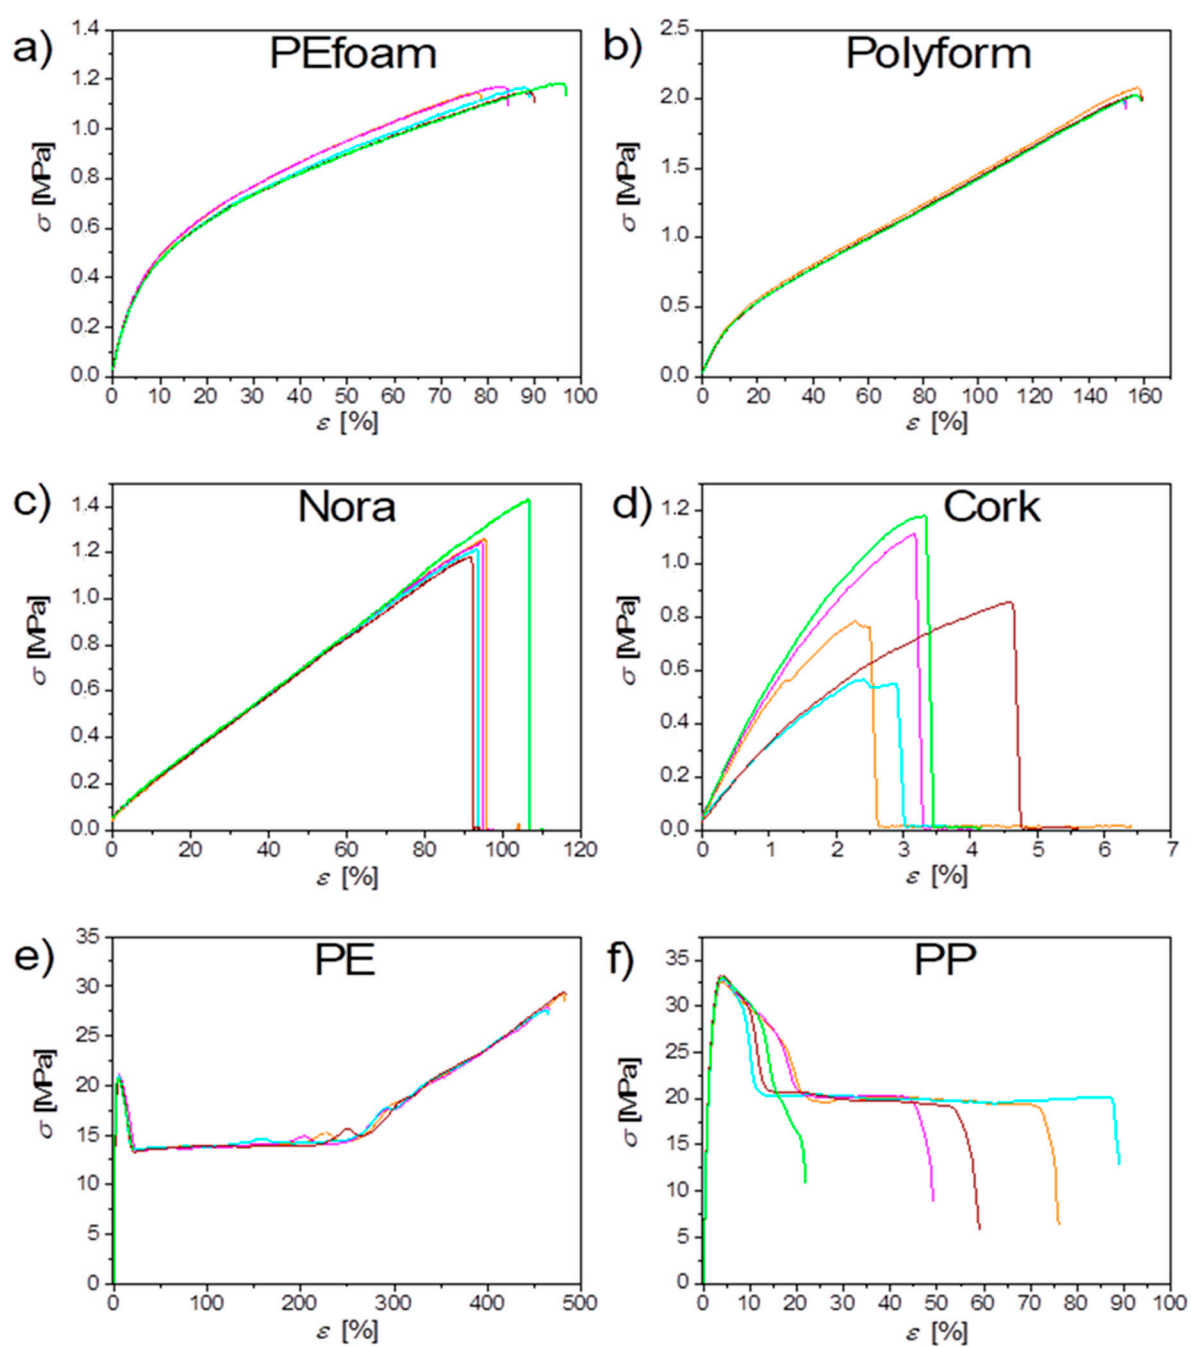

Figure S1. Typical stress-strain curves of paddle-shaped samples made of (a) PEfoam, (b) Polyform, (c) Nora, (d) Cork, (e) PE and (f) PP.
